# Supplementary material for: What are the minimal folding seeds in proteins? Experimental and theoretical assessment of secondary structure propensities of small peptide fragments
Source: Royal Society of Chemistry journal article supplement (doi:10.1039/d3sc04960d), 2023-11-23
Supplement: d3sc04960d3.xlsx [file d3sc04960d3.xlsx]

## Sheet: Sheet1
Tirpeptides not containing proline or histidine	Energy difference between the most stable alpha helical and extended conformer in kcal/mol	Energy difference between the most stable alpha helical and polyproline II conformer in kcal/mol
DKC	-2.60413	-1.54797
DRF	-2.14708	-0.51899
ERC	-1.74338	-0.0828822
DRM	-1.44253	0.591052
DMF	-1.43202	-1.07313
GKF	-1.42032	-1.90682
EEN	-1.30069	-0.180908
DVC	-1.29897	-0.599765
EKF	-1.27474	-1.78936
DQF	-1.24778	-1.0383
DIC	-1.24165	-2.0619
DQL	-1.18929	-1.14331
EKT	-1.15932	0.496518
EMR	-1.14575	-0.461637
EKN	-1.12831	-0.545731
MQY	-1.12382	-2.27017
FRW	-1.10376	-1.19812
KKY	-1.05885	-1.8366
RDD	-0.998407	-1.41358
EKY	-0.952605	-1.8329
EKK	-0.946017	-0.450055
DLQ	-0.905366	-0.123308
RKR	-0.903681	-0.316806
DRL	-0.901672	-0.676385
DRK	-0.889803	-0.717433
ERR	-0.865507	-0.177219
NRY	-0.862699	-0.123717
MEK	-0.834051	-0.409795
EMC	-0.831779	-1.7553
INM	-0.817735	-0.30301
EAC	-0.803055	0.230715
LQY	-0.801327	-1.32436
DMR	-0.789227	-0.637015
RQN	-0.779546	-1.49571
DKN	-0.738353	-1.08038
AQW	-0.735018	-1.35113
WKW	-0.711568	-2.19786
KQI	-0.699704	-0.455782
DRA	-0.640431	-0.492235
MDW	-0.631464	-1.73626
EKS	-0.62855	0.44482
TRY	-0.6279	-0.369778
AES	-0.625342	-1.18928
DLM	-0.617572	0.245029
DRS	-0.609866	-0.413432
LNW	-0.604616	-0.489039
SNW	-0.597846	-1.56319
WRW	-0.589132	-1.50832
SRF	-0.57976	-1.82314
IEW	-0.568084	-0.731522
RQW	-0.550168	-1.1915
GDS	-0.546285	0.303779
DKD	-0.533411	0.184779
DNC	-0.532278	-0.64285
LRL	-0.527411	-0.00885868
MEQ	-0.516765	-2.07486
GRR	-0.515979	-1.1945
DRY	-0.507577	-0.217052
DMY	-0.507191	-0.641269
EQM	-0.506412	0.534074
KQM	-0.497211	-0.391401
IKC	-0.496849	-0.00100381
QRI	-0.491356	-0.68771
WKC	-0.485453	-0.425766
ARF	-0.478052	-1.48181
DRC	-0.473537	-0.141106
RLN	-0.467351	-0.517831
TRW	-0.466588	-1.77141
MKF	-0.46368	-2.24705
RRG	-0.462357	-1.14876
EKR	-0.440204	-0.518769
RRI	-0.43689	-1.56742
ECQ	-0.434804	0.500954
QMW	-0.414349	-1.61677
ARY	-0.413576	-0.353491
DQA	-0.383713	-0.677791
DMW	-0.378033	0.215871
TMW	-0.367198	-0.913904
QEY	-0.366864	-0.267271
VRW	-0.366165	-1.44199
ANC	-0.365664	-0.807337
DCY	-0.364356	0.173293
NMF	-0.36332	-0.328542
TNF	-0.356976	-0.6618
KKW	-0.356644	-1.02671
AKR	-0.345057	-0.839268
GNF	-0.343953	-0.662149
IRY	-0.342859	-0.552976
KNL	-0.340891	-0.681202
DEQ	-0.338386	-0.723831
MNM	-0.337108	0.155177
YRR	-0.331691	-0.169977
ARL	-0.329391	-0.991591
DQM	-0.328874	0.133543
CDF	-0.325021	-0.341703
DRT	-0.322347	-0.322454
NKY	-0.321289	0.188782
DQC	-0.318731	-0.219455
VRF	-0.317293	-0.685321
YKW	-0.315213	-1.11786
RKF	-0.313182	-0.625704
ARC	-0.310951	-1.05042
DED	-0.309451	-0.327766
DAC	-0.30754	-1.14042
AQS	-0.30608	0.0494567
WKF	-0.301383	-0.766488
DNL	-0.296892	-0.428803
SKY	-0.296527	0.00840957
DNS	-0.29561	-0.988668
WQY	-0.293683	0.501777
DVY	-0.293038	-1.11235
CRY	-0.289183	-0.70977
DKR	-0.28408	-0.924781
GRW	-0.284066	0.557615
RRK	-0.280749	-1.32193
KTW	-0.280182	-0.0840997
DNE	-0.268413	0.0397476
DKY	-0.265185	0.0983615
QKY	-0.255916	-0.468665
FRN	-0.25568	1.04008
CMG	-0.255157	0.126138
YQY	-0.239147	-0.639985
RDQ	-0.237484	0.195375
ECF	-0.237266	0.730256
AMW	-0.233848	-1.30816
CRV	-0.233208	-0.781502
ERA	-0.230828	-0.829808
WRS	-0.228521	-1.07096
KQA	-0.215065	0.0137665
DRR	-0.210787	-0.585507
AKT	-0.210605	-0.560756
ITF	-0.207496	-0.198185
KKL	-0.205433	-0.751156
EQW	-0.200517	0.366587
IDQ	-0.199687	-0.530396
QKS	-0.199606	-0.966287
QEN	-0.193785	0.0290903
DCM	-0.193375	0.641323
ARV	-0.188658	-0.343021
DEY	-0.188629	0.564574
DKL	-0.188134	0.201269
VDR	-0.184467	0.3492
QET	-0.180152	-0.585087
YEK	-0.173335	-0.604039
FRM	-0.167609	0.406989
IKL	-0.165777	0.0818318
RRF	-0.165454	-1.54444
ERM	-0.161633	2.03046
EVC	-0.156748	-1.60613
VRQ	-0.15582	0.147433
FKK	-0.14845	-0.293618
DMT	-0.145499	0.105107
KKM	-0.144587	-2.18962
GNN	-0.141126	-1.23434
QKW	-0.137107	-0.586145
QNR	-0.133505	0.224396
YKF	-0.13266	-0.700177
DMQ	-0.129154	-0.108149
RGL	-0.126379	-1.77797
VEF	-0.123586	-0.943882
EKM	-0.121724	1.1559
KRQ	-0.119365	-1.40377
TQD	-0.119048	-1.81503
VEY	-0.114704	0.115979
LRY	-0.108323	-0.750299
MKL	-0.100996	0.524103
KSK	-0.100944	-0.799213
KDK	-0.0891615	-1.66691
DEN	-0.0880527	-0.502598
EVR	-0.0867675	-1.0232
DEW	-0.0836629	-0.959131
DRW	-0.0825506	1.32455
QRT	-0.0808587	0.0356332
YMF	-0.0763967	-0.974709
QNN	-0.0746269	0.0267325
KQL	-0.0733571	-1.08517
ENL	-0.0726598	-0.290623
DNM	-0.0688299	0.722879
EDR	-0.065642	0.241814
LRE	-0.0597009	-0.168074
TNY	-0.0578557	-0.460833
MQW	-0.0528232	-0.108794
WNF	-0.0495895	-1.3684
VRY	-0.0475609	-0.228033
QKE	-0.046133	0.915799
NKE	-0.0447773	0.183059
GRS	-0.0383047	-1.15655
ERL	-0.037701	0.43189
QTY	-0.0371787	-1.42165
MDL	-0.0371145	-0.583657
KNC	-0.030501	0.215646
VQN	-0.0292407	-1.33652
IDM	-0.0289921	-1.44415
LRQ	-0.0285905	-0.384509
WRL	-0.0272918	-0.394844
WDW	-0.0272351	-1.66929
EAM	-0.0260961	1.32523
RRM	-0.0194386	-0.794542
YNC	-0.0130479	-0.930122
TDC	-0.0119632	-0.843211
QDK	-0.0115617	-0.794063
RNQ	-0.00739113	-0.584984
YRW	-0.00682121	0.0981097
NRL	-0.00260654	-0.0200725
DLT	-0.00123249	0.198341
GRF	0.000416592	-1.35253
KQE	0.00398582	-0.302586
QKL	0.00555805	-0.785421
MMA	0.00701033	0.526112
EMM	0.00904201	-0.738821
SEY	0.0108033	-0.932874
RRL	0.0123049	-0.544201
REN	0.0132269	0.560347
YRY	0.0133689	-0.0725898
DTY	0.0139762	0.725258
IQN	0.0157359	-1.78217
DNY	0.0208419	0.854517
SQW	0.0243928	-1.74056
VEW	0.0288392	-0.456813
SKC	0.0300312	-0.123711
AKF	0.0308004	-0.597128
TNG	0.0315845	-0.132309
RMK	0.0325308	-0.616633
KQR	0.0332583	-1.47788
SKS	0.0386512	-0.165729
MKW	0.0407719	-0.312519
RKE	0.0410696	-0.289925
NNR	0.0415911	-0.959639
QRM	0.0416419	-0.753247
GKL	0.0416968	-0.131823
GCY	0.043513	-1.00742
DMM	0.0444405	1.50376
DML	0.0462764	-0.551703
EDD	0.0478205	-0.213197
MRL	0.0481625	0.638501
KEQ	0.049232	0.0899111
LEY	0.0494511	-0.598377
AMY	0.0495808	-1.63657
DKW	0.0522317	-0.470373
FKT	0.0546892	-0.247427
RDY	0.0568316	-0.71348
MNY	0.0576942	-0.669619
DMS	0.0596301	-0.647367
TKN	0.0609549	0.213074
DNG	0.0618081	0.480602
YNW	0.0690391	-0.931336
ATE	0.073646	-0.950237
SSY	0.0758153	-0.934653
GKV	0.0789972	-0.5717
ECW	0.0815358	-0.929578
ENF	0.081981	0.828627
MER	0.086266	-1.00209
RES	0.0868501	-1.19947
SRE	0.0889462	-1.26748
DQS	0.0933042	-0.552493
DMN	0.0950761	0.549387
KNW	0.0969398	-0.140822
NEQ	0.100879	-0.793153
GKM	0.102906	-0.420759
KNN	0.104488	-1.35716
VDF	0.107414	-1.19785
EML	0.108207	-1.11362
YKS	0.108258	-1.45133
LEQ	0.109104	-0.225713
SMW	0.109215	-0.958876
LWY	0.109898	-1.04381
NRC	0.118673	0.831345
GQV	0.124692	0.122479
IWR	0.125748	-1.46821
KQQ	0.127273	-0.150311
RRT	0.134075	0.38893
TEC	0.134461	-0.681317
YKR	0.135795	-1.84195
DMK	0.136396	0.116348
EDM	0.136772	-0.206089
DDC	0.137162	0.333253
GRC	0.140447	-0.434593
TKW	0.14204	0.256955
LQC	0.1478	-0.625124
VNI	0.148804	-0.63753
VQR	0.151961	-0.643128
RRN	0.151982	-0.807129
TRK	0.152547	-0.589989
IEE	0.15266	-0.15592
AMR	0.152793	-2.12451
INW	0.153347	0.240707
MRW	0.153848	-0.526864
EQL	0.159384	0.451698
KRC	0.161042	-0.650228
VKT	0.162391	-0.754084
SQM	0.164417	-1.26787
TKQ	0.164532	-0.163234
YKV	0.164579	0.296676
RKQ	0.165189	-0.324836
RDG	0.169761	0.25062
ACW	0.170761	-1.22093
REL	0.171866	-0.0660317
KKS	0.174537	-1.28295
RMD	0.175094	-0.0278229
DNN	0.177641	0.236132
NMQ	0.17867	0.254947
FMW	0.18035	-1.44858
GRI	0.185292	-0.618055
VDW	0.186147	-0.811396
KRN	0.189742	-0.611883
VQL	0.189972	-1.97703
DWW	0.195325	-1.40183
EMT	0.195598	0.330157
ECC	0.196747	0.0675575
EEC	0.199923	0.049958
VRS	0.201435	-0.428646
CDD	0.201693	2.50429
KLY	0.203773	-0.423746
RCW	0.20512	-0.219482
NKV	0.205132	1.39572
TKR	0.207014	0.209824
MEL	0.209182	-0.764887
NNN	0.209787	0.670314
GDN	0.210665	0.271335
DNI	0.21342	-0.00895327
VDD	0.213522	0.222317
SRW	0.214635	-0.310169
ERS	0.216418	1.06126
NKR	0.218136	-0.378975
ERW	0.218256	-0.585836
QNG	0.220662	-0.323647
NRI	0.222052	0.510263
DEM	0.222846	1.25069
LRW	0.225259	0.680464
ELC	0.226194	0.554873
DKE	0.226633	0.315918
IRR	0.229218	-0.474106
KRT	0.231517	-0.0291002
IEF	0.231674	-1.19095
YRM	0.231817	-0.0202121
ITN	0.233887	-0.942542
QRN	0.236787	1.63229
RKL	0.237757	-0.108923
SKW	0.237958	-0.837867
STI	0.241623	0.197449
IRF	0.242402	-1.42982
LEW	0.24615	-0.416279
DQE	0.24879	-0.193974
YKN	0.249619	-0.656759
VMY	0.249878	-1.32506
GEC	0.250126	-1.04333
ENI	0.251814	1.42159
KNE	0.253008	-0.9566
RID	0.258384	-2.12125
DAN	0.259044	0.0601561
VQC	0.261392	-0.924641
RNF	0.261727	-0.650791
KQF	0.26297	-1.47614
DKM	0.264655	-0.104178
DQQ	0.265972	-0.100684
CKN	0.266223	-0.30311
EAN	0.269717	0.071683
EIN	0.270607	-0.305504
VSY	0.271849	-0.460701
ANY	0.27637	-1.40884
ACR	0.278025	-0.867323
QKN	0.278906	0.224008
AQQ	0.279904	-0.546456
RRR	0.281161	-0.440106
EKQ	0.282208	0.374737
YRN	0.282295	0.702231
DRG	0.28239	0.268524
CKW	0.282985	-0.122919
MTR	0.284915	-1.25831
ENC	0.284947	-0.181434
QRC	0.285444	-0.780362
NRE	0.286409	-0.189863
EEY	0.286638	-0.0173172
QRV	0.287811	-0.27441
TCW	0.289136	0.0495351
DCD	0.290022	1.71925
RNW	0.290397	-0.173321
NEW	0.291208	-0.360217
EKC	0.291552	-1.16396
IKY	0.292626	-1.38319
LRM	0.293159	0.451314
GAY	0.295502	-1.31751
DCC	0.295504	-0.224558
DIS	0.296887	-0.963371
WKD	0.297028	-0.265891
ICY	0.297275	-0.872247
TRG	0.297636	0.10292
DLC	0.29858	-0.248606
FKW	0.298984	-0.327603
YNK	0.29928	-0.696601
SRL	0.300419	0.253082
AEC	0.300959	-0.081344
RQY	0.303974	-0.410547
ENY	0.305597	0.0738913
SRC	0.308814	0.577841
DRE	0.309947	-1.10583
VQI	0.316394	-0.0625374
YDT	0.316499	-1.11585
RKM	0.318035	-0.376384
AKS	0.322213	0.201517
TNV	0.322672	-0.182575
CKM	0.323186	-0.0125557
DKQ	0.32698	0.492626
YRC	0.330899	0.0605137
TEL	0.333967	-0.648886
REV	0.334881	0.0146617
LQF	0.334964	-0.500548
VNY	0.335569	-0.739345
TET	0.336917	0.00568374
KKR	0.338291	-0.0211476
FQY	0.340452	0.116043
QQW	0.340676	-0.751232
KRK	0.341844	-0.586747
QRY	0.345618	-0.0507032
STK	0.346244	-0.835215
ARK	0.346586	-1.10098
QKC	0.348308	0.0480685
NQF	0.350915	-0.919682
ERF	0.351031	0.289875
ACY	0.35245	-1.4411
IKF	0.353717	-0.841572
VEM	0.355389	-0.580024
LQN	0.355621	-0.921431
KEG	0.357003	-0.548031
ECM	0.357574	-0.272631
QDD	0.357789	-0.201378
WKV	0.358061	0.60518
WNE	0.36089	-0.0351586
WDM	0.364728	-0.0292328
YQN	0.366418	0.183604
TKC	0.367491	-1.18851
SKR	0.369864	-0.506126
GQS	0.371913	-1.1333
WIN	0.373555	-0.901372
WRG	0.375869	-0.488928
DCF	0.376129	0.422996
WMC	0.376543	-0.246861
NKN	0.376683	-0.233522
GEF	0.376861	-1.33187
DAT	0.377418	0.265335
DQN	0.379303	0.0160785
KLG	0.380194	-1.31204
LES	0.382271	-0.658799
LLQ	0.382938	-1.15309
WRY	0.383688	0.628012
CKY	0.387325	-0.215179
KKN	0.387569	-0.711846
SRN	0.38776	0.976785
LRV	0.389616	-0.0567456
KRM	0.389887	0.541545
NKW	0.391658	-0.604629
DSM	0.392797	-0.987531
ELR	0.394052	-1.26652
VKI	0.39481	0.410336
YEY	0.395079	-0.626083
QLC	0.396487	-0.493752
KQT	0.397887	-0.165926
DKF	0.39918	0.77895
WAQ	0.399744	-0.460871
TRF	0.401438	-0.471203
KKQ	0.40231	-0.741113
ANW	0.407003	-0.84801
EQY	0.409248	-1.08073
RNI	0.41006	-0.614296
IMK	0.411829	-1.01975
ENM	0.411836	-0.690752
REA	0.41338	-0.382128
ACL	0.415019	-0.696688
EKI	0.415108	0.0244251
YIY	0.416438	-0.463999
TND	0.417485	-0.296597
GRV	0.417784	-0.466147
SEL	0.417872	-0.122658
FKL	0.418709	-0.224383
CDS	0.419107	-0.0430862
ECY	0.419775	0.213803
CKG	0.420422	-0.57347
WCW	0.422321	-0.934912
AKN	0.425174	-1.50124
KKE	0.427712	-0.143598
DCW	0.428878	-0.684489
FNF	0.431609	-0.724933
NKM	0.432394	0.104127
RQI	0.432545	0.609859
CCY	0.433455	-0.488979
GKR	0.433483	-1.973
ERT	0.435275	-0.50696
AEQ	0.435621	-0.275511
RKY	0.436124	0.799611
GMY	0.437317	-0.521595
VQG	0.437385	-0.0157783
RNY	0.438563	-1.39787
DMC	0.441419	-0.061571
NQS	0.442802	-0.0402298
ARM	0.443359	0.606017
AKE	0.443891	-1.04598
IRC	0.443906	-0.628452
VIY	0.445163	-1.22241
YQL	0.44526	0.343021
YQT	0.445776	-0.114625
QEW	0.446011	1.08258
QNL	0.446899	0.286583
QNY	0.449864	0.202122
REE	0.449984	-0.817525
MKQ	0.450285	0.968319
LMC	0.451512	-1.10053
YEG	0.452893	0.20853
EQC	0.455125	-0.388707
GRY	0.456063	-1.17017
VRR	0.456254	-0.939534
VNV	0.456651	-0.907272
GNW	0.457195	-0.429077
NQG	0.457584	0.272637
EMK	0.458301	2.09424
ETW	0.459429	-0.653952
EIM	0.459582	-0.64836
SRR	0.46053	-0.887292
FRF	0.460858	-0.568036
WNW	0.461442	-1.10406
ENR	0.461525	0.322325
RRA	0.463052	-0.444441
DTW	0.463788	-0.443465
SNF	0.464889	0.159077
DRV	0.465379	1.06142
NKF	0.465896	-0.260691
LQM	0.466391	-0.79991
VQY	0.467409	-0.117782
KKV	0.469115	-0.217377
WKN	0.469399	0.875144
ELK	0.469976	0.521837
VMW	0.470429	-1.00538
NMY	0.47045	-0.965632
KNA	0.471415	-0.676227
DQI	0.472457	0.0841445
KEE	0.474445	-1.11856
WKG	0.474814	0.234865
VMK	0.475914	0.327173
DTC	0.476033	-0.217334
QYY	0.476729	-1.22905
GNE	0.477562	-0.509784
SRG	0.481461	0.351791
DCL	0.481728	0.179936
CNQ	0.482412	0.343195
FDN	0.484052	-0.307247
DKS	0.484106	-0.307379
GDW	0.484224	-0.530897
DIM	0.485661	-0.294059
YEC	0.485685	1.01647
GKS	0.487218	-0.727249
GQF	0.487822	-0.779015
RQF	0.489561	-0.679097
GDY	0.489746	-0.600237
ART	0.490763	0.140626
KMN	0.493938	-1.83955
KKI	0.494701	-0.232174
TQI	0.495655	0.692344
LDR	0.496172	-0.698751
TDE	0.496408	-0.371256
VWR	0.496457	-2.18551
REG	0.497247	-0.511921
KDT	0.49777	0.560067
EGW	0.499526	-0.317342
QNM	0.49989	-0.545148
NNW	0.501017	0.537422
EQN	0.501136	-0.883286
VQM	0.502596	0.211626
EDY	0.503981	-0.20762
LCY	0.504535	-1.13173
VMC	0.504614	-0.480423
WQF	0.504908	-0.112071
KRY	0.506863	-0.198672
LEL	0.508805	0.0399926
YMW	0.509642	-0.682141
WMM	0.509844	-0.819642
NRF	0.510023	-0.146464
KWY	0.511571	-1.57259
TMM	0.511636	-0.930563
NMW	0.51223	-0.74749
ANR	0.513029	-1.55684
VEC	0.513124	0.981392
EIR	0.516467	-1.20809
DVQ	0.516492	-0.830463
DRD	0.517224	0.568904
ARD	0.518968	-0.19593
QEF	0.52216	-0.73238
QRQ	0.52258	0.883763
VYW	0.524615	-1.47318
QNW	0.525542	0.0172286
GKG	0.526204	0.916084
SKN	0.526802	0.228872
FQW	0.526912	0.350217
GKC	0.527143	-0.166583
IQT	0.531545	-0.7574
ESL	0.53191	0.576995
CRR	0.533005	-1.15214
MRA	0.533218	-0.491801
LKA	0.535196	-1.12189
NTR	0.537229	-0.353844
DIY	0.540118	-0.615096
QCW	0.540646	-0.435883
IMA	0.540759	-1.12106
RSE	0.54179	-1.5226
YKE	0.541972	-0.123917
WNR	0.543117	-0.12233
DWQ	0.544548	-0.612197
EGK	0.545299	-0.819943
EWY	0.545316	-0.854218
CRC	0.545854	0.383114
MIR	0.547058	-0.412822
TEA	0.547554	-0.0332932
QRF	0.548495	0.0197612
YNF	0.548646	-0.374296
ARQ	0.548977	-0.332219
FKM	0.549171	1.12834
YES	0.549794	-0.501673
RRS	0.550309	0.595287
ENN	0.550836	0.0599446
CRN	0.551225	-0.719749
MRS	0.551775	-0.131835
YRF	0.554702	-0.195027
ANF	0.555569	-0.355821
KDN	0.556009	-1.85501
DTF	0.556024	-0.0414431
DDN	0.556314	0.0800918
FDT	0.556539	-0.842001
EVN	0.557637	-0.726938
CED	0.557674	1.71022
DQK	0.558579	0.0426148
WDC	0.559124	-0.74657
MDE	0.561117	-0.0883705
VNN	0.56414	-0.52284
QCR	0.565862	-0.0957294
ENG	0.567686	1.26059
MDC	0.567956	-0.203874
RNR	0.568135	0.00636847
VDE	0.569226	0.661757
LKN	0.571846	0.278858
RFE	0.572971	-1.48709
MQG	0.574911	-0.505313
WEY	0.574948	-0.157341
ETY	0.575372	0.238028
WRN	0.578314	-1.20962
WQI	0.57866	-0.399426
TLY	0.578995	-0.695189
QQL	0.581099	-0.163718
DSF	0.582097	-0.668117
WMY	0.584087	-0.0987235
QQN	0.584836	-0.171137
LEN	0.586484	0.0983487
VDT	0.586485	-0.958953
KQY	0.587824	-1.76541
DLY	0.589686	-0.156504
DTK	0.592402	-0.481721
REK	0.592688	-0.164989
GMW	0.592725	-0.787162
FMC	0.592844	-0.0709284
DKT	0.593538	-1.27578
SKA	0.594419	0.241082
KKC	0.594998	-0.400588
WQC	0.595171	-0.905377
ERI	0.596628	-0.635152
SKL	0.599508	0.480995
LQW	0.599589	0.00172416
CRQ	0.60267	-0.25349
FDD	0.60618	-0.086046
YQC	0.606203	-0.132067
KRV	0.606357	0.619605
IQM	0.606552	-1.88307
GEM	0.607045	-0.139787
WTE	0.608649	-0.974229
GQQ	0.610578	-1.53532
KYY	0.610701	-0.564211
RMA	0.6132	-0.399894
RMR	0.613437	0.156993
EDW	0.615029	0.0437663
WMR	0.616985	0.0392983
QNQ	0.617432	-0.00969521
TMF	0.618568	-0.230597
NEE	0.618691	0.145985
YLQ	0.619319	-0.0382784
WEE	0.620118	1.40803
DSR	0.621585	0.159638
KDM	0.621891	1.17147
SQC	0.622268	0.782532
IDF	0.622961	-0.734549
NRG	0.624217	0.647023
DGQ	0.62466	-1.06722
EDF	0.624672	0.617979
EDT	0.625791	-0.547367
NRW	0.62587	-0.235371
WTD	0.626048	-0.903287
SEK	0.626423	-1.61859
VAN	0.626559	-0.544057
YKC	0.626925	0.185774
ISE	0.628133	-0.67853
AKQ	0.630303	0.391275
DAS	0.630633	-0.358298
MKT	0.631284	0.16533
RKK	0.63159	-1.94837
MDF	0.63205	0.340615
CNR	0.632362	-0.0265704
CRS	0.632817	0.151439
RLK	0.63292	-0.0612879
ERD	0.633121	1.83927
REY	0.636287	-0.343229
NDF	0.636353	-0.581621
LDT	0.639145	0.35573
VYY	0.639201	-1.03713
QRL	0.639293	-0.331952
ECG	0.639924	0.942763
KCW	0.641703	-1.57645
VQS	0.642141	-0.262681
VAE	0.644363	-0.6311
WER	0.644547	0.0310725
DWR	0.646503	-1.34304
YDW	0.646785	-0.146196
DLR	0.647774	0.128449
NEY	0.648357	0.32977
DNF	0.651152	-0.163565
LKC	0.651157	0.0892496
TNA	0.651843	-0.428778
VKN	0.652342	-0.00955901
QKQ	0.652419	0.961404
RDR	0.652607	0.220788
INY	0.654771	-0.2307
CES	0.655799	-0.67006
IAR	0.656912	-1.81473
KKF	0.657217	-1.36393
VDY	0.658685	-0.834037
MQN	0.658731	-0.558717
RRV	0.660268	0.422418
KMQ	0.661139	-0.523401
CME	0.661357	-0.860262
CEL	0.661427	0.681547
NKC	0.661725	0.416701
DIK	0.662056	-1.19637
KRA	0.6636	-0.623747
DLF	0.665632	0.562623
AQF	0.666313	0.445142
LMF	0.669123	-1.57913
FND	0.66926	0.27898
GSQ	0.670087	-1.22689
DCK	0.670221	3.01636
NMI	0.671933	0.665749
SKF	0.673498	-0.508015
DER	0.675385	-0.424977
YDS	0.676609	-1.02172
YKG	0.676809	-0.191503
KKT	0.677832	0.0590011
QSM	0.679679	0.329414
NQN	0.679681	-0.185685
QEQ	0.680732	0.202948
AQM	0.680948	-0.0866533
EWC	0.681029	-0.846064
GME	0.682188	-0.54476
GCW	0.682281	-0.531162
SNE	0.682325	0.138687
YEN	0.682357	0.258551
TQN	0.684128	-0.483083
RVR	0.68639	-2.50893
NEN	0.687153	0.798767
MQS	0.688657	-0.00972369
GQW	0.688854	-1.08856
EKW	0.689797	0.298792
SQY	0.689837	-0.210005
TQT	0.690359	0.579673
RLY	0.690411	0.27378
RNE	0.691768	-0.324915
EKD	0.693802	1.47316
ERY	0.69382	-0.292764
WKQ	0.69422	0.429956
ADY	0.694842	-1.41463
ANN	0.695595	0.246875
ATY	0.696558	-1.08319
INR	0.696726	0.183177
LQL	0.696843	-0.33643
QNC	0.700711	-0.423672
AQT	0.702757	-0.534914
TEW	0.703121	-0.344727
GKQ	0.705381	-0.620174
KMY	0.707262	-0.197208
QKM	0.707394	0.245514
NKQ	0.708641	1.09139
NNY	0.70915	-0.315179
DFC	0.710693	-0.124525
INL	0.712031	0.451988
RTY	0.713029	-0.277151
CTF	0.713831	0.320778
DRQ	0.716017	-0.583114
DAW	0.718222	1.01109
DWK	0.719418	-1.08993
WNK	0.719649	-0.845308
IND	0.71967	0.0391882
DDI	0.720361	0.125569
SNM	0.720915	0.493439
ACM	0.722981	-1.22522
QCF	0.723707	-0.716169
LMY	0.72425	-1.06174
GRE	0.72853	-0.577857
KTF	0.730276	-0.139503
CQL	0.730565	0.397975
DIR	0.731189	-1.75436
SCW	0.731313	-1.42098
KQD	0.731806	-0.173706
FRQ	0.732259	0.689952
ENE	0.732658	-0.115718
DLN	0.733211	0.125724
DKG	0.73381	0.06552
CKS	0.734192	0.205254
MKY	0.735394	-0.369817
DQR	0.735484	-1.20217
FKE	0.736441	-0.602
QDM	0.736506	-0.050679
KDG	0.736614	0.564325
LKG	0.737235	0.0489667
VQT	0.737333	-1.14879
YKY	0.737898	0.00699879
FLM	0.73975	-0.124289
TEK	0.741576	-0.621734
WDT	0.741583	-0.1535
DGS	0.741596	0.224599
CSI	0.742267	0.681645
DEE	0.745128	0.439447
QQM	0.745402	0.375814
DSC	0.745571	-0.52272
NQR	0.746027	-0.415812
VLW	0.746297	-0.470354
GDC	0.746665	-0.119104
TTF	0.74669	0.144346
CNA	0.747084	0.463571
EKE	0.748396	0.229921
SEV	0.74954	0.431543
REQ	0.749961	-1.83669
LRC	0.751289	0.0413083
IDN	0.75131	-0.0436396
EEW	0.751538	-2.44568
ILF	0.751748	-1.04678
MQQ	0.751761	0.0484578
KEL	0.752206	-1.16711
MKV	0.752548	1.02965
CQW	0.753704	-1.32255
MDK	0.755236	0.216186
DYC	0.755978	0.746917
RNS	0.755994	-0.131316
DAD	0.75661	0.420071
IVE	0.756986	-1.13217
EQS	0.757318	-0.756662
DRI	0.757846	1.06289
RKV	0.757978	-0.00346479
LKK	0.758186	-0.577124
NCW	0.758911	-0.443376
ETD	0.75967	1.05193
CEW	0.760645	0.183653
NQA	0.762253	0.179837
QDY	0.762391	-0.189601
KRG	0.764076	0.325896
KQS	0.765164	0.393059
AML	0.76538	-0.723518
MCY	0.765649	-0.853285
IQW	0.765669	-0.0475556
KAW	0.765756	0.0671734
LMW	0.767831	-1.16589
QNS	0.768374	-0.186393
GNC	0.769688	-0.281833
EQF	0.769872	-0.555129
RTG	0.770452	0.991067
FQF	0.772148	-0.590727
NMM	0.772459	-0.209774
EVM	0.772463	1.00216
KRL	0.774143	-0.12218
SET	0.776116	1.06404
LDW	0.776718	-0.774119
CEE	0.777882	-0.116915
KRW	0.778868	-0.810555
QEL	0.779034	0.85965
NEF	0.779321	-0.401248
EEF	0.779841	-1.18668
SRQ	0.77994	0.723891
QQY	0.780111	-0.125134
EMN	0.78116	-0.182973
VEL	0.785604	-0.22267
MDR	0.78623	-0.533089
VKC	0.786695	-0.684323
DSY	0.787353	-0.639975
QDG	0.788812	0.394201
YKK	0.789785	-0.25842
AQI	0.790661	0.508913
IIW	0.791279	-1.61642
VCC	0.792541	-0.252714
MNL	0.792853	-0.0437015
QQF	0.792946	-0.588312
CNF	0.79464	0.379643
SKG	0.795253	0.553707
IQE	0.795301	-0.692209
KGW	0.795303	-0.791593
DDQ	0.796164	-0.700009
FNR	0.797242	-0.168877
TNL	0.797821	-0.342281
CNW	0.798453	-0.954198
TMY	0.800012	0.226964
DNR	0.802132	-0.602761
IMQ	0.802204	-0.588457
RMN	0.803125	-0.37026
LET	0.803232	-0.321557
RED	0.804356	1.38711
ENK	0.805305	-0.172195
RIC	0.805549	-2.32862
TCY	0.805622	-0.210752
MNE	0.80594	-0.880302
MTW	0.807399	-0.1457
ECI	0.807621	1.65143
MCD	0.808039	-0.743138
QSL	0.808188	0.327698
WKR	0.809274	-0.391286
FIN	0.809517	0.940585
EKA	0.810233	0.332981
QKT	0.810986	-0.318049
NKK	0.812479	0.533699
ECR	0.812721	-0.867406
KRE	0.8138	-1.16224
CQT	0.814501	-0.535522
RLG	0.81454	-0.562515
YCN	0.815827	-1.68924
NNK	0.817452	-0.665844
VQF	0.817676	-1.03581
WKL	0.81891	0.925738
YEE	0.819004	-0.0818409
EAS	0.819033	1.13171
NRK	0.820544	-0.303189
GMM	0.820837	-0.380672
ARA	0.822561	-0.0516016
RCA	0.823959	-1.02408
GMF	0.825984	-1.20444
SCG	0.827202	-0.656427
VRT	0.829189	-0.980549
RAY	0.83135	-0.801866
CQN	0.832168	-0.82141
LEG	0.832423	1.10337
YRA	0.833538	-1.43514
ACF	0.83405	-0.686641
VRA	0.835336	0.273305
LCE	0.835938	-1.24105
LDD	0.836144	-0.654823
TNT	0.83625	-0.990474
NDT	0.836641	-0.587009
RQG	0.83751	0.00657978
AED	0.8376	0.912845
IVW	0.838036	-0.27983
EAG	0.838774	0.456533
DMV	0.839638	1.57984
YMC	0.839786	-0.884998
AMC	0.840297	-1.52143
GNL	0.840312	-0.422901
DND	0.840453	0.925077
RMS	0.840504	-0.885889
MWN	0.84153	-1.09333
EAD	0.842219	1.20239
KSN	0.842979	-0.978094
CRK	0.843027	-0.519233
DNA	0.84339	1.43447
RSC	0.844866	-0.462856
DWC	0.845408	-0.772367
VQK	0.845732	-0.358222
VQW	0.847793	-0.254562
SEF	0.852844	-0.391265
CIN	0.852863	-0.140683
SQL	0.853151	0.391544
MCS	0.853923	0.053549
TRT	0.854247	0.130673
NCK	0.85437	-0.7301
MMF	0.855346	0.416801
RCK	0.855554	-0.0988401
WTW	0.856103	0.025256
CQY	0.856193	-0.724541
KVC	0.860033	-0.666808
QDQ	0.860145	0.200517
LRS	0.860592	-1.20936
ARE	0.860779	0.35074
NQY	0.861461	-0.00125339
SMK	0.86194	0.216907
CCM	0.862288	-0.501733
CNN	0.864781	-0.554966
LKS	0.865658	-0.277302
ELN	0.866042	-0.266749
LVW	0.867738	-0.193021
DCS	0.867753	-0.181202
KNY	0.868919	-0.295008
GNT	0.87006	-0.785924
LLW	0.870883	-0.603376
EDK	0.871002	0.814412
VND	0.872864	0.165352
GRL	0.87297	-0.472216
NNS	0.873349	0.0952306
GEQ	0.873857	0.0438925
KQC	0.873957	-0.427191
SSE	0.875287	-0.0329336
RKS	0.875999	0.747658
AYW	0.877588	-0.978096
KQW	0.877644	0.00949028
SQF	0.877735	0.570391
KCF	0.878127	-0.857398
LRA	0.879904	0.166829
GDL	0.880803	0.640029
GNV	0.880827	0.103472
IDW	0.880888	-0.321933
NRA	0.881075	0.39058
MSY	0.881595	-0.0825095
WIM	0.882006	-0.744703
KCS	0.882308	-0.391432
ADS	0.882317	-0.308599
MQV	0.882968	0.204146
GIY	0.883673	-1.21898
DAY	0.884737	-0.504526
QWY	0.884822	-0.409678
EQG	0.885401	-0.0889185
NQL	0.885462	-0.328503
LNL	0.885644	-0.333398
NNF	0.885942	-1.01165
VKG	0.885972	1.14417
LMN	0.886185	-0.0686616
VDS	0.887962	0.291986
NKL	0.888234	0.149719
TEY	0.888507	0.0854394
EMA	0.888807	0.878899
EAQ	0.889021	0.0558412
KWS	0.889061	-0.449185
GEN	0.889477	-0.646606
LKW	0.889613	0.00176792
WWC	0.890346	-1.0051
ITM	0.890746	0.133048
WQN	0.890773	-0.0688177
EIC	0.890801	-0.421073
LTE	0.891587	-0.715783
QRS	0.893204	1.01026
LRG	0.893592	-0.350789
TEQ	0.893621	0.29577
QMY	0.894173	-0.58418
KML	0.894637	0.876392
KRF	0.897029	0.293601
MLY	0.897238	-0.702459
YAQ	0.89735	0.995504
AKY	0.899039	-0.0889462
WRD	0.899268	1.02248
DAM	0.901454	-0.741048
SNY	0.90173	0.834657
NTN	0.902179	-0.358754
VTL	0.902733	-0.258549
SLY	0.903374	0.157462
VSK	0.9035	-0.539397
FEF	0.904971	0.680115
GSL	0.90499	-0.69541
NDW	0.905239	0.0254672
YQA	0.905389	-0.342201
ETL	0.905955	0.0266414
GNQ	0.906372	-0.502595
TTL	0.906915	-0.405307
STR	0.907246	-0.0952243
ETS	0.907399	-0.0559326
WNS	0.908486	-0.330096
SRS	0.908731	-0.420146
QQE	0.909845	-0.12968
SCN	0.910538	-0.172711
VCG	0.910653	0.424993
VNF	0.910948	-0.211198
ARI	0.911167	0.210648
AKC	0.911245	-0.276543
NCL	0.91193	-0.618091
ETQ	0.912116	-0.738471
YQW	0.912276	-0.539733
NRR	0.912913	1.23996
GQY	0.913341	0.366341
KWL	0.914814	-0.220073
WRC	0.916978	0.499441
MTM	0.917484	-0.274454
NLR	0.918135	-1.1488
VRL	0.918389	0.930341
EFY	0.918656	-0.510092
DSQ	0.918946	-0.798041
LQS	0.920507	-0.460187
MMW	0.920734	-1.04197
RQM	0.922349	-0.475811
DQD	0.923696	0.814195
GDT	0.924346	-0.242797
WRK	0.924466	0.619201
AQL	0.924728	0.0648514
GKA	0.926432	0.628972
AEA	0.926831	-0.164233
DVM	0.927605	-0.419578
ACS	0.927623	-0.534493
ANM	0.928435	-0.270512
DTE	0.931826	1.03869
WQE	0.93254	0.240824
SLM	0.932988	-0.78148
ILL	0.933028	-0.245348
SQV	0.933077	0.312017
TSE	0.933327	-0.894987
CEG	0.933347	-1.01489
SCC	0.934198	-0.344854
VKS	0.935317	0.430893
SMY	0.935618	-0.850631
FKF	0.936491	0.209607
EEM	0.937094	0.948716
CNC	0.938406	-0.644412
WND	0.938808	0.0771415
MDY	0.939787	-0.414287
ELY	0.939967	1.14366
LTF	0.940147	-0.120236
KEV	0.940344	-0.192911
EQQ	0.941125	-0.685552
TED	0.941258	0.658811
FEQ	0.941395	0.217882
FRR	0.941561	-0.0133227
MNT	0.94302	0.409301
ECN	0.944045	0.724772
DDY	0.944201	0.0543775
TQG	0.945856	-0.446596
DQW	0.946	0.265137
YKT	0.946033	-0.641477
LML	0.946042	0.597458
SNN	0.946348	0.876716
IRL	0.946364	0.481764
WMS	0.947627	-0.266631
GQC	0.947917	-1.30077
ESR	0.94838	0.292733
NRT	0.949417	0.51173
RCC	0.949721	-0.558008
DEC	0.950016	0.467582
MKR	0.950212	-0.30836
LER	0.950581	-1.45572
CQF	0.950946	-0.745296
MEY	0.950963	-0.247896
GNM	0.950975	0.00431469
MRE	0.95109	0.333831
RSD	0.952343	0.541378
VTM	0.952631	0.347471
FNW	0.95298	-0.303024
WMW	0.953144	0.503078
GTR	0.953344	-0.522406
DVW	0.954622	-0.299415
TDY	0.954994	-1.04025
FKN	0.955126	-0.0407986
RYT	0.95537	-0.676478
RMF	0.957075	-1.42122
CSF	0.959408	-0.955534
LNI	0.960301	0.0640041
SML	0.960819	0.0350543
LLR	0.961176	-1.89162
SIE	0.961317	0.388715
VNR	0.961457	-0.371681
GEI	0.961738	-0.0999618
SQS	0.961761	-1.05303
SCT	0.962076	-1.08097
ASR	0.962307	-1.02735
WIG	0.963002	-0.706391
NNL	0.964185	-0.0410235
TNN	0.965121	0.064587
ASN	0.966801	-0.199699
DST	0.967301	0.275486
NGL	0.967708	-0.154812
KCD	0.967855	-2.16752
WMK	0.968292	0.228729
VVW	0.968558	-1.72884
KDQ	0.968752	-0.727998
LNS	0.969181	-0.0190965
VMQ	0.969671	0.129287
TAQ	0.970345	-0.441171
IDY	0.97036	-0.375592
QTS	0.970892	-0.648579
ACT	0.97133	-1.43442
DGF	0.972102	-0.536338
IKS	0.972918	0.301228
FDE	0.97314	0.062814
KVY	0.973339	-1.54511
FTN	0.973394	0.276761
YNT	0.974458	0.550586
GWW	0.975203	-1.53236
QKD	0.975447	1.05403
DQG	0.976148	0.280053
WQQ	0.976346	-0.943725
QTT	0.976792	0.00810555
TNC	0.977474	-0.0538613
IWM	0.977495	-1.80761
KQK	0.978315	0.0451476
LRN	0.979368	-0.01665
MES	0.979674	0.980879
AQG	0.980044	0.114168
DCQ	0.981641	-0.229773
RRD	0.982517	-0.0325208
AKW	0.983171	-0.192204
WDY	0.983612	-0.263989
RTK	0.983835	-0.187633
GEK	0.984061	0.329785
RTF	0.984642	-0.734581
KNG	0.984732	0.265673
CRT	0.984806	0.841485
DTM	0.985132	0.19041
QRR	0.985212	0.427795
ETM	0.985816	-0.263277
DEK	0.985974	1.42377
WLE	0.986176	-0.0897599
TQF	0.98624	-0.356251
LKF	0.986594	0.00794206
CQK	0.986696	-0.612409
LRF	0.986779	-0.681985
VNW	0.986786	-0.0654245
GSR	0.988117	-1.28961
WWF	0.988184	-0.382622
LMS	0.990261	-0.579317
VYL	0.990623	-1.00145
GEY	0.991507	-0.641377
ANG	0.99219	-0.085696
EFL	0.993056	-0.225198
INE	0.993074	-0.642747
AIY	0.993284	0.112692
DNW	0.993692	-0.0332169
LLE	0.994033	-0.688331
CRM	0.994551	0.687225
REC	0.995464	1.00755
SMR	0.995946	-0.237925
EDN	0.99662	-0.0467992
CEN	0.996817	-0.146545
GKE	0.997699	0.0974861
ADT	0.998151	-0.412023
MDQ	1.00181	-0.435991
GCF	1.00259	-0.705777
IRE	1.00324	-0.967951
GQD	1.00383	0.130292
KDW	1.0046	-0.693215
DCG	1.00483	0.99591
IKT	1.00514	0.477961
RCD	1.00524	-0.407693
VCM	1.00565	-0.650281
DTD	1.00579	0.91078
IED	1.00712	0.304595
VVC	1.00845	-1.48388
CDC	1.01032	0.18451
NRM	1.01084	0.150902
AQE	1.01159	-0.688053
NCF	1.01186	-0.125751
AQN	1.012	0.369789
QIR	1.01272	-0.586037
QTC	1.01345	-0.021908
CNE	1.014	-0.169609
ARW	1.01451	-0.710456
QAM	1.01511	0.33562
DFN	1.01608	-0.312483
RQS	1.01619	-0.631566
WNI	1.01654	0.564312
YCY	1.01701	1.19762
KET	1.01762	0.275706
LCF	1.01825	-0.729637
ESC	1.01837	-0.468697
EQD	1.01885	1.16804
YSY	1.01904	0.41477
GQA	1.01972	-0.640541
DFS	1.02004	-1.1188
VKV	1.02069	0.089018
CDW	1.02135	0.221659
EVW	1.02137	0.124349
LDV	1.02155	0.576719
RGQ	1.02157	-1.26065
IEY	1.02241	0.916992
LNF	1.02303	-0.556511
NDQ	1.02382	0.362274
IDG	1.02515	0.872671
CRF	1.02745	0.363559
LDE	1.0293	0.336812
WRQ	1.02957	-0.103821
REW	1.03004	-0.53996
TRC	1.03011	-0.88832
WNC	1.03061	0.30693
KLI	1.03143	-0.598071
GMT	1.03223	-0.218937
AMD	1.03235	-0.0766236
SRY	1.03242	-1.17861
IAM	1.03259	0.0343221
MQE	1.03337	0.143586
YCC	1.03382	-0.697492
ERG	1.03468	1.84635
DTQ	1.03475	-0.147076
IDI	1.03593	0.132415
KSE	1.03804	-1.3745
NRQ	1.03875	0.00731319
GKK	1.03938	0.778477
CRI	1.03979	-0.074829
DDA	1.04108	0.428083
IES	1.04255	-0.841697
GES	1.04366	-0.170386
DRN	1.04461	0.874265
QCE	1.0449	0.106009
QCI	1.04604	0.0634584
DDS	1.04605	-0.179027
GTE	1.04781	-0.306624
MKC	1.04818	0.997108
MQL	1.04827	-0.710965
EEL	1.04917	0.29805
WRF	1.04941	-1.07601
DQY	1.05005	0.0140479
AQR	1.05015	-0.993706
VRC	1.05027	-0.237993
EMI	1.05028	0.867262
CEF	1.05084	0.0421836
ERQ	1.05221	-0.357767
STF	1.05255	0.196737
AQA	1.0546	-0.184429
LAE	1.05488	0.100068
KAC	1.0552	0.108047
SKQ	1.05545	-0.261803
QDW	1.05576	0.380351
QCL	1.05742	0.539759
YNY	1.05861	0.269549
NDM	1.05864	0.240094
DGK	1.05866	0.391188
LEE	1.05941	1.31706
RNL	1.05951	0.0634601
MEE	1.05988	-0.861412
EKL	1.0609	0.355016
DKK	1.0628	0.624419
SDR	1.06353	-0.689509
RRC	1.06368	0.253674
ATK	1.06369	-0.900681
MKA	1.06386	0.718114
ADM	1.0642	-0.166897
FNM	1.06457	-0.207913
RWG	1.0646	-0.134732
DVA	1.06528	0.115232
IIY	1.06747	-0.789144
DMA	1.06749	0.997509
FKR	1.06752	-0.242767
RKD	1.06758	-0.519451
NQM	1.06768	0.937625
YEQ	1.06926	-0.224059
GTT	1.06964	-0.11145
ATF	1.07018	-0.652072
VQA	1.07053	-0.09426
MCQ	1.07061	0.0797758
MKK	1.07311	-0.791677
YGC	1.07326	-1.09435
FKC	1.07515	-0.525898
QQC	1.07517	-0.254755
GSF	1.07535	-0.0639098
KAN	1.07574	0.194856
EYY	1.07584	-1.09975
IER	1.0759	-0.147496
VWT	1.07657	-1.273
RMW	1.0774	-1.68394
IEM	1.07801	0.767109
KCI	1.07908	-0.379516
RVW	1.07908	-0.9727
RDF	1.07941	-0.577182
NEA	1.07965	0.0966544
NDS	1.08109	0.420768
GCM	1.08166	-0.293424
MQD	1.08176	0.944047
WQD	1.08178	0.250856
WWW	1.08184	-0.217122
FRI	1.08208	-0.154306
KLN	1.08279	-0.970066
LDG	1.08305	0.35668
TNK	1.08317	0.316369
RLW	1.08332	-1.06897
TKT	1.08332	0.00829454
DWM	1.08415	0.514622
EEV	1.08451	-0.309519
KSL	1.0848	-0.88511
SNV	1.08514	1.10653
KMF	1.08615	-1.12847
IRI	1.08706	0.742816
DET	1.08831	0.517282
QNA	1.09043	-0.0522739
DCE	1.09137	0.428691
KSV	1.09193	0.646354
AMF	1.09344	-0.192603
LTW	1.09352	-0.912531
EWM	1.09363	-0.287933
WAW	1.09452	-0.465182
DSW	1.09462	1.1068
VDI	1.09565	-0.196849
FRV	1.09605	0.140673
LRR	1.09626	-0.0252318
ETR	1.09739	0.231212
CNS	1.09769	-0.410008
RKC	1.09844	0.078552
EAE	1.09997	0.0729659
RQR	1.10014	0.49537
YWT	1.10166	-0.610127
TRA	1.10187	-0.350936
INK	1.10217	-0.398761
LEF	1.10228	-0.944626
VWQ	1.1031	-1.34849
NEM	1.10316	0.997684
NRV	1.10318	0.4468
YSE	1.10348	-1.20407
LIR	1.10448	-2.20821
TKD	1.10539	1.04565
TMQ	1.10588	-0.316296
CDY	1.10596	-0.728412
AEW	1.106	0.808805
WCM	1.10737	-0.0192569
SDE	1.10773	0.691768
ARG	1.10775	-0.215974
AQD	1.10892	0.659679
AKI	1.10931	0.142544
YMS	1.11013	-0.187311
WFM	1.11073	-1.32665
MRC	1.11136	0.317806
GML	1.11159	0.508603
RCY	1.11268	-2.0051
FEW	1.11279	-1.42976
MKS	1.11282	1.71066
TNW	1.11411	-0.119931
EIW	1.11415	-0.224084
IKW	1.11418	-0.725659
ERV	1.11431	0.369731
QRE	1.11453	-0.613052
RDW	1.11511	-0.553814
TMC	1.11547	-0.760514
QER	1.11652	0.716701
ERN	1.11718	1.61579
ITD	1.11853	-0.00470595
ARS	1.11898	1.64084
QEC	1.11939	0.481765
GEE	1.12018	-0.08132
ALW	1.12026	-0.216725
CER	1.12177	-0.854481
MTL	1.12189	1.5162
CRA	1.12221	0.899294
DTT	1.12331	-0.569119
GLN	1.12353	-0.535543
TKL	1.12394	-1.31729
VFE	1.12451	-2.25364
AMM	1.12467	0.680362
LDQ	1.1253	0.178884
MRF	1.12583	0.417236
GQM	1.12619	-1.14471
ADN	1.12795	-0.594876
AMN	1.12844	-0.415203
TQY	1.12925	-0.290537
YCW	1.13003	0.403525
EEK	1.13104	-0.40333
KRD	1.13125	1.05681
CEM	1.13309	-0.600887
ADG	1.13312	0.150123
DDW	1.13435	-0.709449
WRA	1.13443	-0.282497
MQM	1.13472	-0.75474
KSS	1.13535	-1.13868
NKT	1.13572	1.17658
SDS	1.13742	0.467777
ADF	1.13819	-1.50909
VMR	1.13837	0.419484
KMG	1.13918	-0.0554934
GVK	1.14034	-1.48654
VKA	1.14038	0.280008
KFM	1.1406	-1.4656
FES	1.14067	0.949505
KCC	1.1416	-0.922807
QDE	1.14318	-0.456889
TLE	1.14332	0.135433
STQ	1.14363	-0.30955
LDF	1.14422	-0.92887
FEY	1.14453	-0.461182
AQC	1.14524	-0.473493
ELT	1.14589	0.633153
VEN	1.14718	-0.150361
EIY	1.14753	-1.41892
KEI	1.14788	-0.404275
CKR	1.14945	-0.609711
KKG	1.15266	-0.390216
DNK	1.15289	0.167774
MSM	1.15328	-0.0938887
MCC	1.15609	-0.493632
FDY	1.15637	-0.177284
TQC	1.15662	-0.27778
LQR	1.15808	-0.575208
ASW	1.15849	-0.537088
RSW	1.15868	-0.307967
RIT	1.15874	0.378865
AEL	1.15953	0.0704565
SDC	1.15961	0.748665
TRD	1.16012	0.823132
EMS	1.16019	-0.156381
TEF	1.16059	-1.18315
LCT	1.16271	-0.317229
YLW	1.16299	0.75787
IKG	1.16399	-0.577054
RRE	1.1641	-0.564529
ECL	1.16493	1.04388
RWE	1.16526	-1.38253
KVM	1.16648	-1.49843
LSE	1.16687	-1.55225
NCI	1.1677	0.108398
AFR	1.16839	-1.43933
SKV	1.16902	0.602426
NDC	1.16923	0.184801
DAQ	1.17007	0.0420612
WED	1.17061	0.570218
IQR	1.17102	-0.554088
CSQ	1.17212	0.901606
NDN	1.17225	0.799271
YRT	1.17343	-0.523567
EWQ	1.17488	-1.02174
NMG	1.17548	0.707812
CNK	1.17649	0.14674
KCY	1.17704	-0.996752
CQI	1.17718	0.505602
GCS	1.17811	-1.13932
CNY	1.17818	-0.472722
QQI	1.17832	0.552485
ETC	1.17863	-0.183498
KST	1.17896	0.103083
VRK	1.17896	-0.0818058
MQT	1.17944	0.545127
IEC	1.17996	-0.28641
TWE	1.18049	-1.72859
ISY	1.18052	-0.462547
TQK	1.18142	0.196485
KLW	1.18151	-1.31899
AVC	1.18263	-1.42663
ALQ	1.18372	0.102222
NMC	1.18533	0.018607
DSK	1.18545	0.628836
WLW	1.18683	1.01078
YDK	1.18694	-0.657069
TMS	1.18726	-0.0699259
FRY	1.18752	-0.297209
MDT	1.18867	-0.0331053
TKF	1.18869	-0.752409
QCD	1.18885	-0.268454
ISM	1.18956	-0.518711
MCF	1.19034	-0.395978
KFN	1.19056	-0.421188
ESN	1.19217	0.190604
RCL	1.19292	-1.38699
TCR	1.1942	-0.642039
MRN	1.19464	0.727691
MQF	1.19492	-0.289709
EMW	1.19497	-0.767901
FCY	1.19587	-0.991036
RDS	1.19593	0.196651
LLG	1.19598	-1.05653
TTT	1.19622	0.52342
KLS	1.19665	0.144603
CNM	1.1992	0.614625
DYM	1.19921	0.76479
YEA	1.20011	0.765583
LQA	1.20221	0.133924
CQS	1.2024	0.119564
INC	1.20256	0.436891
FRG	1.20324	0.966194
KIL	1.20327	0.49789
IDT	1.20346	-0.397581
QTE	1.20349	0.209472
DSN	1.20361	-0.235867
SER	1.20406	-0.152138
DIW	1.20423	-0.790158
KWA	1.20514	0.210564
WCF	1.20592	-0.518853
NNM	1.20643	-0.261969
WDK	1.20693	-0.227574
MAN	1.20716	-0.183554
ATM	1.20744	0.249517
NET	1.20761	0.137663
NDY	1.20765	-0.179831
TCQ	1.20886	-0.527116
YYR	1.21091	-0.167754
QTQ	1.21103	0.836702
ISW	1.21366	0.0445042
RAR	1.21433	0.219778
YDL	1.2154	-0.550975
YMK	1.21702	0.29673
KEW	1.21729	-0.00892665
FKS	1.21747	1.49163
YMQ	1.21871	-0.0676756
YRD	1.21985	-0.0494
DVR	1.22087	-0.629694
ADA	1.22098	-0.196312
RRW	1.22187	-0.206947
GEW	1.22207	1.168
DFL	1.22229	-1.13582
GCR	1.22293	-1.04595
AND	1.22297	0.0926071
VDA	1.22312	-0.0282091
ANE	1.22347	0.409165
QNF	1.22361	-0.132975
LDM	1.22371	-0.139342
IQI	1.22461	-0.491289
DIF	1.22469	-0.580347
RER	1.2251	0.244173
MNQ	1.22603	0.169288
RQK	1.22834	1.61086
TWW	1.22844	-0.0129405
DIT	1.22861	0.0107698
VLR	1.22862	-0.64183
NDL	1.22894	0.0942567
GEA	1.22936	0.894706
LCN	1.23011	-0.21093
ANL	1.23036	0.538452
MND	1.2308	0.648742
ADE	1.23099	-0.790996
STW	1.23124	0.789231
RND	1.2313	0.652233
GQL	1.23151	-0.111584
DYY	1.23184	-0.397268
IYQ	1.23337	-0.561916
YCM	1.23353	0.170377
SYY	1.23386	-0.755696
VWL	1.23556	-0.732036
SNR	1.23587	-0.0820284
DTG	1.23627	0.0703873
DIE	1.23695	1.09635
MRQ	1.23699	-0.398327
GMA	1.23834	-0.130035
LLS	1.23889	-0.465583
MKI	1.23931	1.04352
QLE	1.23932	-0.945184
WKK	1.23977	-1.41677
WEK	1.24022	0.0738079
CRG	1.24088	0.551924
SEE	1.24115	0.314984
IKE	1.24132	-0.909833
KTD	1.24205	0.532231
QQK	1.24255	-0.149901
TQM	1.2428	-0.903738
KNV	1.24356	-0.157847
VNS	1.24364	0.0459765
CCE	1.24539	0.432826
MNF	1.24617	-0.0494928
GER	1.24716	-1.36027
CCN	1.24731	0.229884
ILW	1.24779	0.296398
RKT	1.24805	0.375707
NTC	1.24862	0.792328
RRQ	1.25037	0.176151
DKA	1.25077	0.310362
WCD	1.25313	0.612105
LDC	1.25326	0.4576
NCM	1.25352	-0.156703
TEM	1.25369	-0.162065
YTD	1.2537	0.147067
KMS	1.25384	-1.11143
QKF	1.25389	-0.556967
RCV	1.25473	-0.361292
RIY	1.25507	-1.86352
VSC	1.25508	-0.459695
LEC	1.25543	-1.17877
TDN	1.25608	0.226374
SQQ	1.25775	0.00267912
LKQ	1.25788	-0.0650686
YYK	1.2582	-0.189231
CTY	1.25868	0.683005
KNR	1.2588	0.434359
YSK	1.25948	-0.395659
VDC	1.25996	0.41765
GCT	1.26	0.196683
SGK	1.26005	-0.186569
MSV	1.2614	0.128633
LNT	1.26196	-0.0521306
ALR	1.262	-0.899631
WAS	1.26273	0.335338
TLD	1.26279	0.284989
QDT	1.26374	0.531729
IDS	1.26375	0.770909
LCW	1.26465	-1.07451
ESD	1.26534	0.651958
DNT	1.26562	-0.100398
GNY	1.2658	-0.286396
RIM	1.26584	-1.25192
AKM	1.26602	0.123556
KND	1.26681	0.5833
EAT	1.26699	0.725047
RRY	1.26823	-1.41662
TNS	1.26869	-0.24323
QTW	1.26887	-1.15804
YKA	1.26932	0.83567
LTS	1.2701	-0.0245797
SFF	1.27043	-0.751826
VSG	1.27117	-0.208847
VKY	1.27259	0.430766
EQT	1.27347	0.617262
IQA	1.27398	-0.178139
ISI	1.27446	0.621492
VEK	1.27513	-0.370118
VCI	1.27519	-0.063969
TEV	1.27546	0.298397
WKA	1.27583	-1.12066
GMV	1.27692	-0.468459
WIR	1.27737	-0.735939
IGG	1.27742	-1.06789
AKK	1.27762	0.15799
RQA	1.27776	-0.124292
SKM	1.27777	0.148065
VVN	1.27845	-0.724636
RNN	1.27848	-0.196805
CEQ	1.27871	-0.0570338
GDQ	1.2797	-0.748077
AQV	1.28064	0.510661
KRS	1.2813	0.0945127
VNT	1.28296	-0.793288
NRN	1.28303	1.19705
WMV	1.28432	0.739308
LQI	1.28447	-0.710202
WDG	1.28584	0.129623
SDK	1.28599	-0.479275
MDS	1.2862	0.271563
SNK	1.28687	-0.477269
EID	1.28801	1.5715
EWW	1.29013	-0.581906
MIC	1.29057	-0.651726
IRW	1.29096	-0.746446
LKI	1.29126	0.15132
VGI	1.29136	-1.47152
CKF	1.29153	-0.426208
ETF	1.29195	-0.0137092
NTM	1.29196	0.157046
QCY	1.29202	-0.325566
MVD	1.29267	-0.14831
ANT	1.29292	-0.267743
EQI	1.29351	-0.063593
ICC	1.29363	0.0213867
MLK	1.29402	0.233417
LKL	1.29485	-0.870937
NTW	1.29507	-0.429731
FDK	1.29567	0.192656
ANA	1.29599	-0.375574
YAG	1.2965	-0.0708169
YEF	1.29665	0.526798
WQL	1.29775	0.248601
LDS	1.29819	-0.112869
LEA	1.29827	0.507715
TRL	1.30002	-0.0795723
QDS	1.30074	-0.435607
DMI	1.30117	1.63758
KCN	1.30225	-1.40813
VRV	1.30255	-0.6889
CCR	1.30273	-1.34043
ENA	1.30284	1.36578
NWR	1.30314	-0.262753
TDM	1.30374	-0.567948
ETE	1.30386	-0.570127
DKV	1.30464	0.280889
FYY	1.30476	-0.945776
TDT	1.305	0.262988
ITR	1.30543	-0.265765
ACA	1.30635	-0.875088
YQF	1.30672	0.508072
MDM	1.30723	0.840132
CKI	1.30761	0.556027
ANQ	1.30768	-0.456238
NAR	1.30858	-0.332252
TNI	1.30973	0.344776
GKN	1.30973	0.268955
SNI	1.3102	0.146315
IMR	1.31101	-0.687411
QQQ	1.3123	0.283387
DAF	1.31298	0.626349
RMG	1.31345	0.171218
STM	1.3136	0.195362
NLC	1.31396	-0.333873
DFM	1.3143	0.188552
CML	1.31678	0.37613
SKD	1.31684	1.27282
NCQ	1.31773	-0.0490075
TRN	1.31782	0.325302
YDN	1.31886	-0.267566
VKW	1.31901	-0.458834
RWW	1.31912	-0.479617
GTS	1.31997	0.443559
ADW	1.32045	-0.344764
NDD	1.3209	1.19939
VNQ	1.32155	0.0972443
MCE	1.32218	-0.689556
EDQ	1.323	1.16852
ILE	1.32302	-0.174113
WKY	1.32349	0.828413
GRD	1.32369	0.0128265
GQE	1.32466	-0.536999
CDT	1.32488	0.149718
YET	1.32575	-0.137508
KYQ	1.32575	-0.656948
LCD	1.32596	0.136794
ESY	1.32612	-0.213033
SEC	1.32612	0.0306485
IKM	1.32625	1.25347
SGQ	1.32737	0.0177053
DTA	1.3276	0.388162
QSE	1.32791	0.222689
RWF	1.32801	-0.615243
CRW	1.32835	-0.314298
VTY	1.32859	0.178418
MNS	1.32937	-0.220952
VEE	1.32963	0.138317
KDC	1.33	-1.32788
DNQ	1.33009	0.727635
QNI	1.33034	1.71889
VKF	1.33132	0.205289
FIQ	1.33163	-0.358869
IKA	1.33256	0.276183
KLF	1.33285	-0.751315
SSQ	1.33321	-0.112357
GLY	1.33381	-0.698549
GNG	1.33579	-0.0774041
VEQ	1.33595	0.112227
EVS	1.33619	-0.354506
CNG	1.33672	0.532508
RTV	1.33699	0.17622
SKT	1.33711	0.728501
CTE	1.33732	1.0388
LKE	1.33789	0.600153
FVY	1.33822	-1.5007
RLC	1.33831	-0.175099
MCT	1.33842	-0.325468
DTI	1.33871	0.920295
TEN	1.34029	0.121623
LWE	1.34051	-0.312157
GKT	1.34069	-0.318666
ADL	1.34085	-0.162087
GGG	1.34147	-0.395939
YFY	1.34184	0.291255
GCC	1.34221	0.0028561
QDL	1.34231	0.753898
WIL	1.34543	-0.75234
GRA	1.3456	-1.17856
IEN	1.34632	1.08185
SNT	1.34635	-0.120245
KTY	1.34711	0.249983
MME	1.3478	-0.21795
FAR	1.3479	-1.06948
NQD	1.34802	0.708143
YRI	1.34851	1.98954
RGR	1.34882	0.0693428
GSI	1.34925	0.530438
KTN	1.35046	-0.147987
ITL	1.3513	-1.72636
KCL	1.35252	-0.711458
WRE	1.35278	-0.110894
DEF	1.35288	-0.463187
DIQ	1.35327	-0.255863
KEY	1.35487	0.317059
IRD	1.35492	0.507754
SMN	1.35552	-0.367638
NLN	1.35572	-0.108491
DGR	1.35594	-0.437779
ATC	1.35654	-0.169147
VSN	1.35877	-0.35078
SAD	1.36054	0.308621
ICG	1.36124	-1.30006
FEG	1.36188	-0.444742
FQE	1.36234	-0.445953
LTC	1.36261	-0.406499
YSF	1.36266	-0.787305
DLW	1.36269	-0.457742
NGN	1.3637	-0.0960298
LNR	1.36409	-1.44262
SRV	1.36448	1.03643
DVE	1.36448	0.634909
TTY	1.36456	-0.537979
RNA	1.36521	0.93242
TKA	1.36617	0.217625
QCT	1.36659	0.526727
SMT	1.36672	0.705558
ITK	1.36804	0.327502
FED	1.36861	0.238778
IWS	1.36872	-1.09666
CRL	1.37003	0.432289
TLW	1.37089	-0.268364
SVY	1.37122	-0.315016
GDK	1.37156	-0.333213
LMR	1.37271	-0.968708
YDQ	1.37279	0.0764437
KSF	1.37449	-0.266508
IWE	1.37502	-1.27078
LSY	1.37508	-0.62944
LNA	1.37642	-0.09496
LRK	1.37654	0.795513
SEA	1.37678	0.109845
GKW	1.37758	0.318797
TKY	1.37832	0.231062
TSA	1.3784	0.27478
GLW	1.37859	-1.05093
VNK	1.38087	0.239987
SCF	1.38181	-0.0410121
QTG	1.38224	0.446391
NES	1.38231	0.0802562
CCL	1.38253	0.422146
YIW	1.38311	-0.831135
YDG	1.38343	0.93816
YMM	1.38376	0.138688
IKD	1.38422	0.713851
FDR	1.38461	-1.58359
NSW	1.3848	-0.819786
EDC	1.38498	0.00919097
QRD	1.38534	0.0752132
RQL	1.38612	0.267836
VMM	1.38678	-0.187245
LNQ	1.38853	0.308797
ARN	1.38864	0.798304
YNN	1.38883	0.330203
VKL	1.38902	-0.167882
QML	1.38907	0.57016
NWQ	1.38915	0.784514
TKS	1.39154	0.0710545
MET	1.39225	-0.303797
DAE	1.39229	-0.177204
ISC	1.39262	0.10019
EAY	1.39288	1.2281
LNN	1.3929	0.127627
GVR	1.39296	-1.31274
ILN	1.39316	0.328291
LSL	1.39318	0.0610255
FMQ	1.39417	-0.588767
ADC	1.39503	-0.20816
VQE	1.39515	-0.241198
SIY	1.39528	-0.707965
QRG	1.39574	-0.294793
CEA	1.39787	0.833706
RTL	1.39805	-0.805974
GKI	1.3994	1.14585
INV	1.40025	-0.087288
VCE	1.40033	-0.0887693
AQY	1.40087	0.2146
NCY	1.40108	0.402426
MSI	1.40257	-0.702709
WRT	1.40311	0.0924137
IQC	1.40352	0.221182
IKR	1.40544	-0.342888
KEC	1.40546	0.747432
VMS	1.40636	0.423962
DVS	1.40737	-0.0777586
WRM	1.40746	0.849649
GTL	1.4082	0.172312
RNM	1.40867	-0.939679
MSL	1.40925	-1.17522
QKI	1.40945	1.35328
LKY	1.41071	0.231176
DDT	1.41089	0.548622
ICK	1.41144	-0.479403
LQE	1.41175	0.0930535
QCQ	1.41181	-0.0639965
FQC	1.41212	-0.0590031
WEG	1.41258	-0.0969444
ECV	1.41293	0.437521
YRS	1.41339	-0.282402
YDY	1.4134	-0.667199
QMV	1.41425	0.407051
WYE	1.41476	-0.500749
EES	1.41482	1.38303
TDW	1.41497	-0.371869
EMQ	1.41518	0.665061
LTM	1.41584	-0.342262
MLC	1.41615	0.0424516
QMF	1.41639	0.55814
EYN	1.41687	-0.253299
WFY	1.4169	-1.23125
WNM	1.41697	0.314381
ANS	1.41708	-0.262798
LGW	1.41735	-0.432391
VQV	1.41826	0.694399
SKK	1.41914	0.175736
CEY	1.41967	0.63864
STL	1.41999	0.583905
GQG	1.42057	-0.494412
DCI	1.42137	2.20906
GLD	1.42141	-0.306409
WDE	1.42352	0.664865
DDG	1.42582	-0.282087
RNG	1.42598	0.220461
TML	1.4261	0.964925
GKY	1.42701	1.6264
MQR	1.42716	-0.82284
LKD	1.42732	0.150367
FVW	1.42736	-0.691259
RML	1.42758	-1.29432
WLF	1.4283	-0.40307
KNF	1.4287	-0.51125
TST	1.42886	0.163069
QDA	1.42933	-0.566999
DIL	1.43027	0.928275
GMR	1.43064	-0.365956
AEN	1.43114	0.0601492
QVR	1.43175	-1.23685
DTL	1.43201	0.143516
SQI	1.43212	-0.624005
WET	1.43259	-0.0764664
AVY	1.43264	-0.645025
SDA	1.43306	-0.388203
FQD	1.43469	0.0204064
DEG	1.43508	0.5199
YQG	1.4351	-0.156488
KEF	1.43665	0.246037
KFD	1.43721	1.51554
DYQ	1.43744	-0.309235
IQG	1.43781	-0.0217048
CTL	1.43789	1.6402
KIE	1.43832	-1.49935
DVG	1.43945	0.763464
WFN	1.44036	0.0846626
SDL	1.44051	0.263444
ENT	1.44056	1.03418
[truncated: 6,002 more rows]
